# Supplementary material for: HrpE, the major component of the Xanthomonas type three protein secretion pilus, elicits plant immunity responses
Source: PubMed Central journal article supplement (PMC6026121; doi:10.1038/s41598-018-27869-1), 2018-06-29
Supplement: 41598_2018_27869_MOESM1_ESM.pdf [file 41598_2018_27869_MOESM1_ESM.pdf]

## Supplementary Information

### **HrpE, the major component of the Xanthomonas type three protein secretion pilus, elicits plant immunity responses**

Natalia Gottig<sup>¶\*</sup>, Cecilia V. Vranych<sup>¶</sup>, Germán G. Sgro, Ainelén Piazza,  
Jorgelina Ottado\*

Instituto de Biología Molecular y Celular de Rosario, Consejo Nacional de Investigaciones Científicas y Técnicas (IBR-CONICET) and Facultad de Ciencias Bioquímicas y Farmacéuticas, Universidad Nacional de Rosario (UNR). Ocampo y Esmeralda, Rosario, Argentina.

\* Corresponding authors: Dra. Natalia Gottig ([gottig@ibr-conicet.gov.ar](mailto:gottig@ibr-conicet.gov.ar)) and Dra. Jorgelina Ottado ([ottado@ibr-conicet.gov.ar](mailto:ottado@ibr-conicet.gov.ar))

<sup>¶</sup> These authors contributed equally to this work

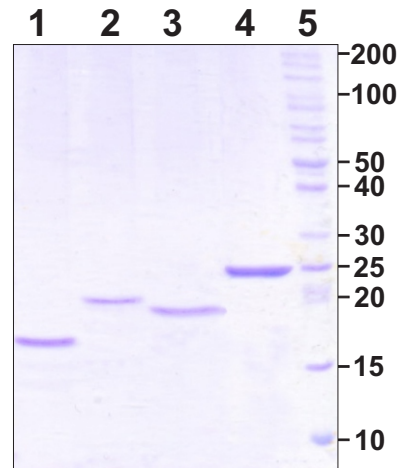

**Figure S1.** SDS-PAGE analysis of purified proteins. Purity and protein molecular weight were visualised by SDS-PAGE in a 15% polyacrylamide gel. 20  $\mu$ l of 5  $\mu$ M protein solutions were loaded in each lane. Lane 1: Trx, lane 2: N-HrpE, lane 3: C-HrpE, lane 4: HrpE and lane 5: marker (PageRuler. Thermo Scientific).

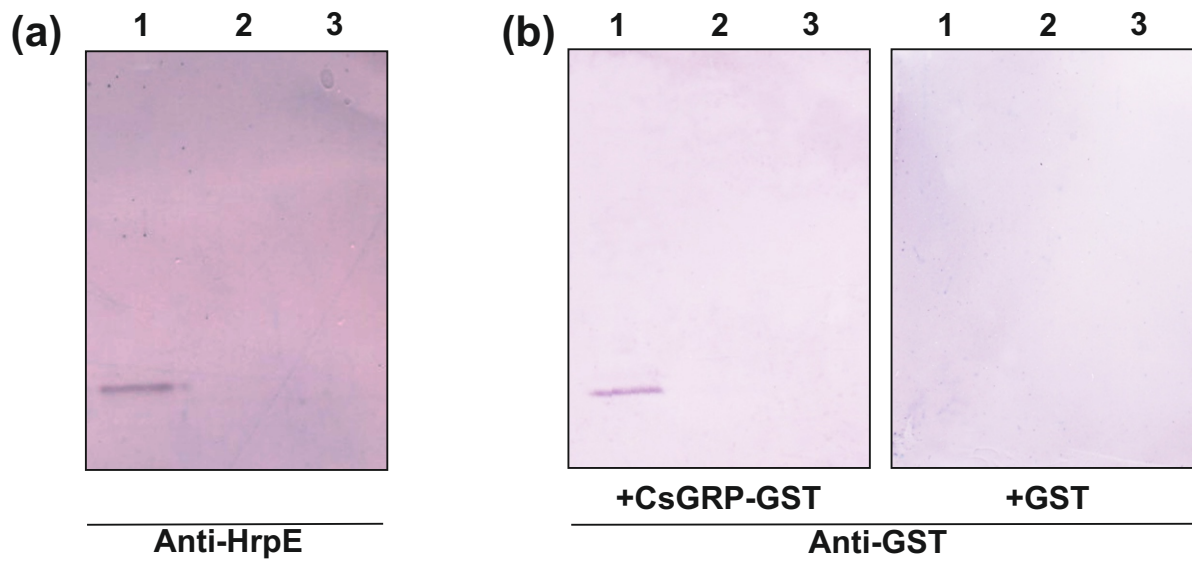

**Figure S2.** Full-length Western and Far Western Blots as in Figure 4 (b) and (c). **(a)** Purification of the Hrp-pilus from *XcchrpG*<sup>+</sup> (lane 1) and *XcchrpG*<sup>-</sup> (lane 2) grown in XVM2 medium and from *XcchrpG*<sup>+</sup> (lane 3) grown in SB. Proteins obtained from pilus preparations were analyzed by Tricine-SDS-PAGE and Western blot revealed with anti-HrpE polyclonal antibody. **(b)** Far Western blots showing interactions between HrpE present in the Hrp-pilus preparations and CsGRP-GST. Nitrocellulose membranes similar to that showed in **(b)** were incubated with 50  $\mu$ g CsGRP-GST or GST as a control and, after washing, probed with anti-GST polyclonal antibody.

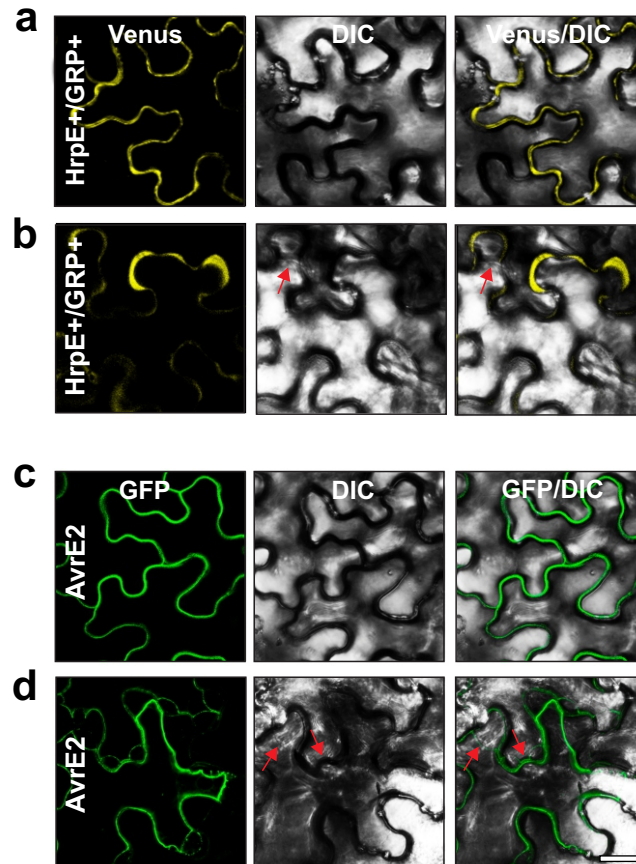

**Figure S3.** Localization of HrpE/CsGRP interaction upon plasmolysis. **(a)** Localization of HrpE+/CsGRP+ interaction without plasmolysis and **(b)** upon plasmolysis induced by 0.8 M mM mannitol for 20 min. The retracted plasma membranes are shown by red arrows and they do not have associated fluorescence **(b)**. **(c)** Localization of the membrane protein, AvrXacE2-GFP (AvrXacE2). **(d)** Upon plasmolysis; fluorescence associated with the retracted plasma membrane from the cell wall is shown by red arrows. Analyses were performed by Confocal laser-scanning microscopy Scale bars represent 25  $\mu$ m. DIC: Differential Interference Contrast.

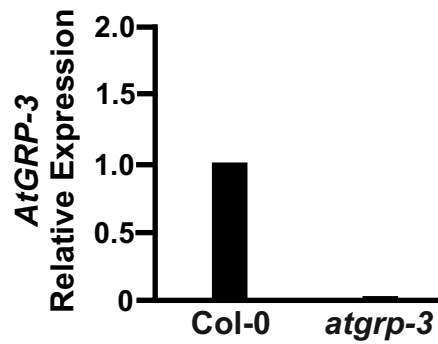

**Figure S4.** Analysis of *AtGRP-3* expression in the Arabidopsis null mutant *atgrp-3*. RNA was extracted from leaves of *A. thaliana* Col-0 and *atgrp-3* mutant line and qRT-PCR assays were performed. Expression in Col-0 was considered as 1. Values are the means of three biological replicates with three technical replicates each.

a

|      |                                                        |
|------|--------------------------------------------------------|
| Xcv  | MQIFPEVSSWRSRVGQGMDCFTGGLSNGISGAAALSGANGQMSLLGDMSAS    |
| Xcc  | MELLPQISSIKSRFDQGTDAYTGGVSGGISGEAALTGANGQMSSLI SDMTAS  |
| Xam  | MELFPQMSSSLKSRFDQGTDAYTGGVSGGISGASALSGANGQMSSLI SDMTAS |
| Xcvi | MELFPQMSSSLKSRFDQGTDAYTGGVSGGISGTSALSGANGQMSSLI SDMTAS |
| Xcb  | MEIFPQISSIKSRFQGIDGYTGGVSGGISGEAALYGSNRQMSSLI SDLTAS   |
| Xoo  | MEILPQISSLNSRFEQGM DGYTGGVAGGISGASALSGSNGQMSSLI SDMGAS |
| Xcm  | MELFPQISSIRSRFVQGM DGYTGGVSGGISGASALSGSNGQMSSLI SDLTAS |
| Xaa  | MELFPQISSLNSRFEQGM DGYTGGVSGGISGAGALSGANGQMNSLI SDMAAS |
| Xac  | MELFPQISSLNSRFEQGM DGYTGGVSGGISGAAALSGADGQMSSLI SDMTAS |
| Xag  | MELFPQISSLNSRFEQGM DGYTGGVSGGISGADALSGANGQMSSLI SDMTAS |
|      | *:::*::** .** . * * :***::.**** ** *:: **.***.:* **    |
| Xcv  | DEA QKSMNNKITMLKNDLDFNVALNKFIGKAGDNAKQLVGQ             |
| Xcc  | DEA QKSMNNKITQLKNDLDFNVALNKFIGKAGDNAKQLVGQ             |
| Xam  | DEA QKSMNNKITQLKNDLDFNVALNKFIGKAGDNAKQLVGQ             |
| Xcvi | DEA QKSMNNKITMLKNDLDFNVALNKFIGKAGDNAKQLVGQ             |
| Xcb  | DEA QKSLNNKITMLKNDLDFNVVLNKFIGKAGDNAKQLVGQ             |
| Xoo  | DEA QKSMNNKITQLKNDLDFNVALNKFIGKAGDNAKQLVGQ             |
| Xcm  | DEA QKSMNNKITMLKNDLDFNVALNKFIGKAGDNAKQLVGQ             |
| Xaa  | DEA QKSMNNKNTMLKNDLDFNVALNKFIGKAGDNAKQLVGQ             |
| Xac  | DEA QKSLNNKITMLKNDLDFNVALNKFIGKAGDNAKQLVGQ             |
| Xag  | DEA QKSMNNKITMLKNDLDFNVALNKFIGKAGDNAKQLVGQ             |
|      | *****:*** * *****.******.*****.*****                   |

b

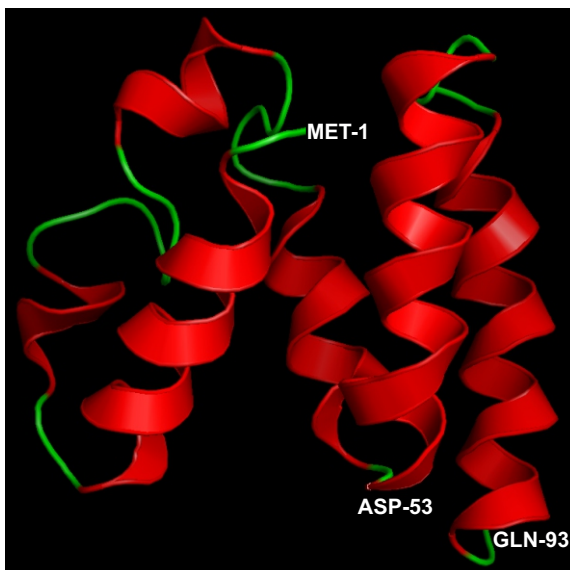

**Figure S5.** Conservation and structural modeling of *Xcc* HrpE. (a) The sequences of HrpE proteins present in different *Xanthomonas* were aligned using ClustalW program. Asterisks (\*) indicate identical amino acids, colons (:) are conservative replacements, full stops (.) are semi-conservative replacements. In red is shown the Asp53 amino acid. Xcv: *Xanthomonas campestris* pv. *vesicatoria*, Xcc: *Xanthomonas citri* subsp. *citri*, Xam: *Xanthomonas axonopodis* pv. *malvacearum*, Xcvi: *Xanthomonas campestris* pv. *viticola*, Xcb: *Xanthomonas campestris* pv. *begonia*, Xoo: *Xanthomonas oryzae* pv. *oryzicola*, Xcm: *Xanthomonas citri* subsp. *malvacearum*, Xaa: *Xanthomonas alfalfae* subsp. *alfalfa*, Xac: *Xanthomonas axonopodis* pv. *citrumelo*, Xag: *Xanthomonas axonopodis* pv. *glycines*. (b) Schematic representation of the structural model of HrpE created with the Robetta server. The protein is predicted to fold in several  $\alpha$ -helical regions but with more disordered portions at the N-terminal region. The initial methionine (MET-1), the 53 aspartic acid where the protein was dissected (ASP-53) and the final glutamine (GLN-93) are labeled in white.

**Table S1.** Identified *Citrus sinensis* proteins that interact with HrpE by yeast two-hybrid assay.

| <b>Predicted protein</b>                       | <b>Accession number</b> | <b>Initial codon</b> |
|------------------------------------------------|-------------------------|----------------------|
| Glycine-rich protein-like                      | XP_006469561.1          | 1                    |
| Small heat shock protein                       | XP_006473921.1          | 1                    |
| Putative metallothionein-like protein          | ABL67648.1              | 1                    |
| Probable receptor-like protein kinase          | XP_024044862.1          | 2                    |
| At5g24010                                      |                         |                      |
| Protein YLS9-like                              | XP_006481585.1          | 43                   |
| COP9 signalosome complex subunit 5a isoform X1 | XP_006450164.1          | 31                   |
| Copper transporter 1                           | XP_006424955.1          | 1                    |
| Protein SRC2-like                              | XP_015389034.1          | 5                    |
| Polyubiquitin 11                               | XP_006480632.1          | 1                    |
| Actin-depolymerizing factor                    | XP_006489736.1          | 1                    |
| Lectin                                         | XP_006495232.1          | 1                    |
| Ran-binding protein 1 homolog a-like           | XP_006488552.1          | 68                   |
| Lipid-transfer protein precursor               | NP_001275802.1          | 23                   |
| Probable purine permease 11 isoform X2         | XP_006464374.1          | 19                   |
| Pathogenesis-related protein 1-like            | XP_006486822.1          | 30                   |

**Table S2.** Oligonucleotides used in this study.

| Oligonucleotide | Sequence                           | Use                               |
|-----------------|------------------------------------|-----------------------------------|
| HrpEf           | ATCAGGATCCATGGAATTATTACCGCAAATCAG  | Full HrpE cloning in pET32a       |
| HrpEr           | ATACAAGCTTTTACTGGCCAACGAGCTGCTT    | Full HrpE cloning in pET32a       |
| NHrpEr          | ATACAAGCTTTTACGAGGCGTTCATGTCACTG   | N-terminal HrpE cloning in pET32a |
| CHrpEf          | CAGTAGAATTCGACGAGGCCAGAAGTCCATG    | C-terminal HrpE cloning in pET32a |
| CsGRPf          | CACGTGTCGACATGGGTTCCAAATTGTT       | Full CsGRP cloning in pGEX-4T3    |
| CsGRPr          | CACGTGCGGCCGCTCAGTTTTGAGGCT        | Full CsGRP cloning in pGEX-4T3    |
| HrpE-BDf        | CAGTAGAATTCATGGAATTATTACCGCAAATCAG | Full HrpE cloning in pOBD         |
| HrpE-BDr        | CAGTACTGCAGTTACTGGCCAACGAGCTGCTT   | Full HrpE cloning in pOBD         |
| N-HrpE-BDr      | CAGTACTGCAGTTACGAGGCGTTCATGTCACTG  | N-terminal HrpE cloning in pOBD   |
| C-HrpE-BDf      | CAGTAGAATTCGACGAGGCCAGAAGTCCATG    | C-terminal HrpE cloning in pOBD   |
| CsGRP-ADf       | CAGTAGAATTCATGGGTTCCAAATTGTTCC     | Full CsGRP cloning in pOAD        |
| CsGRP-ADr       | CAGTAGGATCCTCAGTTTTGAGGCTCGGTTTC   | Full CsGRP cloning in pOAD        |
| C-CsGRPADf      | AGTAGAATTCGGTGGCCGTGGAGTTAT        | C-terminal CsGRP cloning in pOAD  |
| AtGRP-3ADf      | AGTAGAATTCGCATCTTCTGCCACAGTG       | Full AtGRP-3 cloning in pOAD      |
| AtGRP-3ADr      | CAGTACTGCAGTTAGTGACCGGGCTGAGTC     | Full AtGRP-3 cloning in pOAD      |
| C-AtGRP-3ADf    | AGTAGAATTCGGCTACGGTGACAATGGAG      | C-terminal CsGRP cloning in pOAD  |
| HrpEBiFCf       | ATACAAGCTTGATGGAATTATTACCGCAAATC   | Full HrpE cloning in pSAT         |
| HrpEBiFCr       | ATCAGGATCCCCTGGCCAACGAGCTGCTTGGC   | Full HrpE cloning in pSAT         |
| CsGRPBiFCf      | ATACAAGCTTGATGGGTTCCAAATTGTTCTTC   | Full CsGRP cloning in pSAT        |
| CsGRPBiFCr      | ATCAGGATCCCGTTTTGAGGCTCGGTTTCAGG   | Full CsGRP cloning in pSAT        |
| CsACT-L         | GAGCTGAAAGATTCCGTTGC               | RT-qPCR (citrus housekeeping)     |
| CsACT-R         | TTGATCTTCATGCTGCTTGG               | RT-qPCR (citrus housekeeping)     |
| CsGST-L         | AACCTACTTGGAACACACTAGAAGA          | RT-qPCR                           |
| CsGST-R         | GTTTCATCAGATATCTTAAGGCTGGTA        | RT-qPCR                           |
| CsSOD-L         | CAGAAGCATCACCAGGCTTA               | RT-qPCR                           |
| CsSOD-R         | CAATGCTTCCAGAGAACCAA               | RT-qPCR                           |
| CsMAPK3-L       | TTACATGATGAAGCCGATGAAC             | RT-qPCR                           |
| CsMAPK3-R       | TGAGTGCTAATGCCTCCTGATA             | RT-qPCR                           |
| CsMKK4-L        | GGCACCTCGATACTTTGTT                | RT-qPCR                           |
| CsMKK4-R        | TAATCCCTCCGTAGGCATC                | RT-qPCR                           |
| CsPR1-L         | AAAGTTGTTCAAACCTTTTTGTCCTT         | RT-qPCR                           |
| CsPR1-R         | ACATGATCAATAGTAGGGATGTTAGC         | RT-qPCR                           |
| CsPR4-L         | GTGTGATTCTGTCACTTTGTCTACTG         | RT-qPCR                           |
| CsPR4-R         | ACTGTTTGTGACCCTTAAGCAC             | RT-qPCR                           |
| CsHMGR-L        | AAACTAATGTGGCTACACTGGTAGAG         | RT-qPCR                           |
| CsHMGR-R        | AATATGTAGATCCTTCCCATCATTTA         | RT-qPCR                           |
| CsPAL-L         | ATAATGGAACATATCTTGGATGGTAG         | RT-qPCR                           |
| CsPAL-R         | CTTGAATTATCCATAGAGACCAAT           | RT-qPCR                           |
| SIRp12-L        | CGTGGTGTGCTATGAATCC                | RT-qPCR (tomato housekeeping)     |
| SIRp12-R        | GTCAGCTTTGGCAGCAGTAG               | RT-qPCR (tomato housekeeping)     |
| SIPti5-L        | GCTAGACATGGTGCGAGAGT               | RT-qPCR                           |
| SIPti5-R        | TCTACTGAAACAGAGGCGTTC              | RT-qPCR                           |
| SILrr2-L        | AAGATTGGAGGTTGCCATTGGAGC           | RT-qPCR                           |
| SILrr22-R       | ATCGCGATGAATGATCGGTGGAGT           | RT-qPCR                           |
| SIGras2-L       | ATGTGAGGGCATGGAAAGAG               | RT-qPCR                           |
| SIGras2-R       | TCCATCCCAACAACATAGCTC              | RT-qPCR                           |
| SIWRKY28-L      | ACAGATGCAGCTACCTCATCCTCA           | RT-qPCR                           |



|            |                              |                                    |
|------------|------------------------------|------------------------------------|
| SIWRKY28-R | GTGCTCAAAGCCTCATGGTTCTTG     | RT-qPCR                            |
| AtTUB-L    | GAGAATGCTGATGAGTGCATGG       | RT-qPCR (Arabidopsis housekeeping) |
| AtTUB-R    | CAGGGAACCTCAGACAGCAAGT       | RT-qPCR (Arabidopsis housekeeping) |
| AtPR1-L    | TTCTTCCCTCGAAAGCTCA          | RT-qPCR                            |
| AtPR1-R    | AAGGCCACCAGAGTGTA            | RT-qPCR                            |
| AtGST1-L   | ACCGTTGTTGAAGAAGAAGA         | RT-qPCR                            |
| AtGST1-R   | GCTCGTCGAAGAGTTTCTTA         | RT-qPCR                            |
| AtPAL1-L   | GAAGTTCTTCGAAAGCGTTA         | RT-qPCR                            |
| AtPAL1-R   | CCTCACTAAATCCTTTGCAC         | RT-qPCR                            |
| CsGRP-L    | CACGTGTCGACATGGGTTCCAAATTGTT | RT-qPCR                            |
| CsGRP-R    | CACGTGCGCCGCTCAGTTTTGAGGCT   | RT-qPCR                            |
| AtGRP-3L   | GTGGGCGACAAGGAGGAG           | RT-qPCR                            |
| AtGRP-3R   | TTAGTGACCGGGCTGAGTC          | RT-qPCR                            |
